# Supplementary material for: Soluble nanographene as a novel cool matrix for small molecule analysis using MALDI-TOF MS
Source: Royal Society of Chemistry journal article supplement (doi:10.1039/c6ra10447a), 2016-01-01
Supplement: c6ra10447a1.pdf [file c6ra10447a1.pdf]

## *Support Information*

### **A soluble nanographene as a novel cool matrix for small molecular analysis by using MALDI-TOF MS**

He Wei, Zhiqi Zhang, Jing Zhang\*

<sup>†</sup>Key Laboratory of Analytical Chemistry for Life Science of Shaanxi Province, School of Chemistry  
& Chemical Engineering, Shaanxi Normal University, Xi'an 710062, China.

#### **SUPPLEMENTARY INFORMATION**

##### FIGURE CAPTIONS

1. Supplementary **Figure S1**. The structure of hexaperi-hexabenzocircumcoronenes (HBCCs)
2. Supplementary **Figure S2**. MALDI spectra of sulfathiazole with five different matrixes: (a) is CHCA; (b) is THAP; (c) is DHB; (d) is graphene; (e) is HBCCs.
3. Supplementary **Figure S3**. The MALDI spectra of three conventional matrixes: CHCA (a), THAP (b), DHB (c); and the new matrix HBCCs (d). The molecular weight of interference peaks were showed in this picture.
4. The Table S2 displayed the interference peaks and the fragment's structure of these four matrixes.
5. Supplementary **Figure S4**. MALDI-TOF mass spectra of (a) is sulfathiazole ( $m/z$  294.0,  $[M + K]^+$ ), (b) is sulfamerazine ( $m/z$  303.1,  $[M + K]^+$ ) and (c) is sulfadimidine ( $m/z$  317.1,  $[M + K]^+$ ); and (d) is norfloxacin ( $m/z$  320.1,  $[M + H]^+$ ;  $m/z$  332.1,  $[M + Na]^+$ ), (e) is ciprofloxacin ( $m/z$  342.1,  $[M + H]^+$ ;  $m/z$  354.2,  $[M + Na]^+$ ), (f) is ofloxacin ( $m/z$  362.1,  $[M + H]^+$ ;  $m/z$  384.1,  $[M + Na]^+$ ).

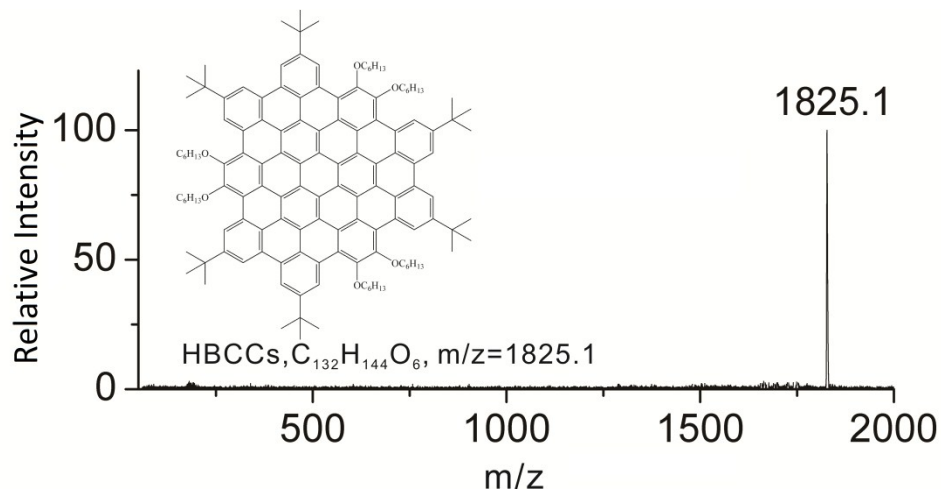

**Figure S 1.** The structure of hexaperi-hexabenzocircumcoronenes (HBCCs)

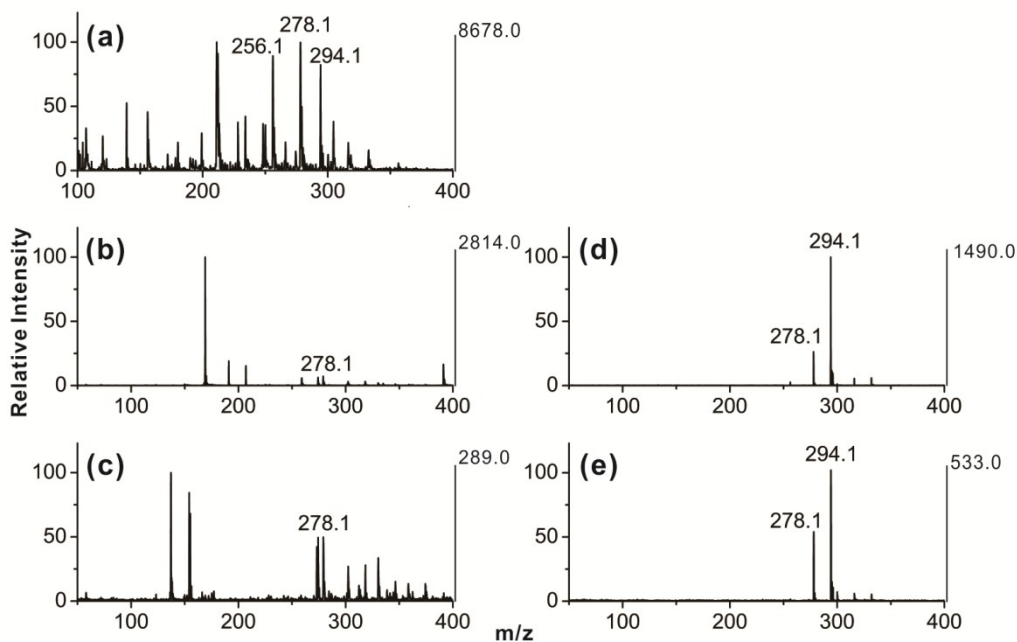

**Figure S2.** MALDI spectra of sulfathiazole with five different matrixes: (a) is CHCA; (b) is THAP; (c) is DHB; (d) is graphene; (e) is HBCCs.

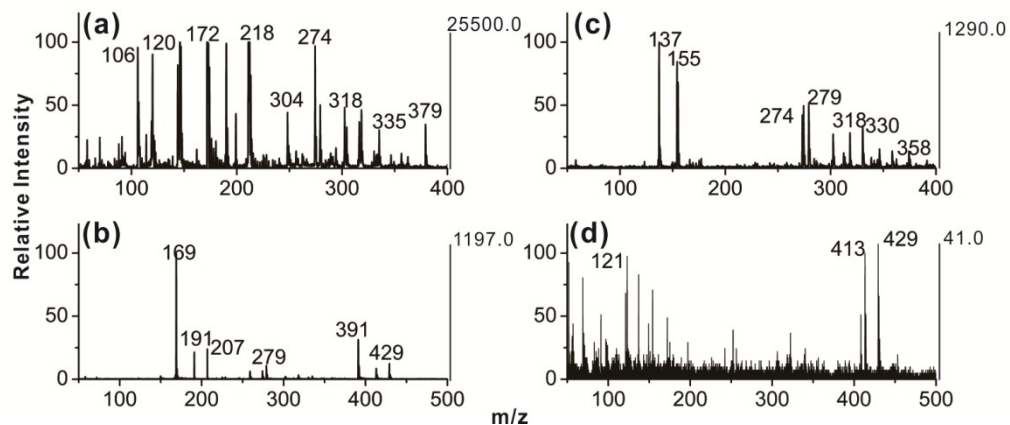

**Figure S3.** The MALDI spectra of three conventional matrixes: CHCA (a), THAP (b), DHB (c); and the new matrix HBCCs (d). The molecular weight of interference peaks were showed in this picture. And then the Table S2 displayed the interference peaks and the fragment's structure of these four matrixes.

**Table S 1. The structure of the matrix interference peaks for Figure S3.**

| MALDI Matrix                                                                        | Ionized peak                                                                        |                                                                                        |                                                                                         |                                                                                                                                                                                  |
|-------------------------------------------------------------------------------------|-------------------------------------------------------------------------------------|----------------------------------------------------------------------------------------|-----------------------------------------------------------------------------------------|----------------------------------------------------------------------------------------------------------------------------------------------------------------------------------|
|                                                                                     | 1                                                                                   | 2                                                                                      | 3                                                                                       | 4                                                                                                                                                                                |
| CHCA                                                                                | 189                                                                                 | 172                                                                                    | 146                                                                                     | 274                                                                                                                                                                              |
| 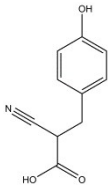   |    |       |  +2H  |  +<br> +3H |
| DHB                                                                                 | 137                                                                                 | 155                                                                                    | 274                                                                                     | 279                                                                                                                                                                              |
|  |  |  +H |  x2 |  +H] x3                                                                                     |
| HBCCs                                                                               | -                                                                                   | -                                                                                      | -                                                                                       | -                                                                                                                                                                                |

  

| MALDI Matrix                                                                        | Ionized peak                                                                            |                                                                                                                                                                                  |                                                                                                                                                                                    |                                                                                          |
|-------------------------------------------------------------------------------------|-----------------------------------------------------------------------------------------|----------------------------------------------------------------------------------------------------------------------------------------------------------------------------------|------------------------------------------------------------------------------------------------------------------------------------------------------------------------------------|------------------------------------------------------------------------------------------|
|                                                                                     | 5                                                                                       | 6                                                                                                                                                                                | 7                                                                                                                                                                                  | 8                                                                                        |
| CHCA                                                                                | 304                                                                                     | 318                                                                                                                                                                              | 335                                                                                                                                                                                | 379                                                                                      |
|  |  +2H |  +<br> +2H |  +<br> +2H |  +H |
| DHB                                                                                 | 302                                                                                     | 318                                                                                                                                                                              | 330                                                                                                                                                                                |                                                                                          |

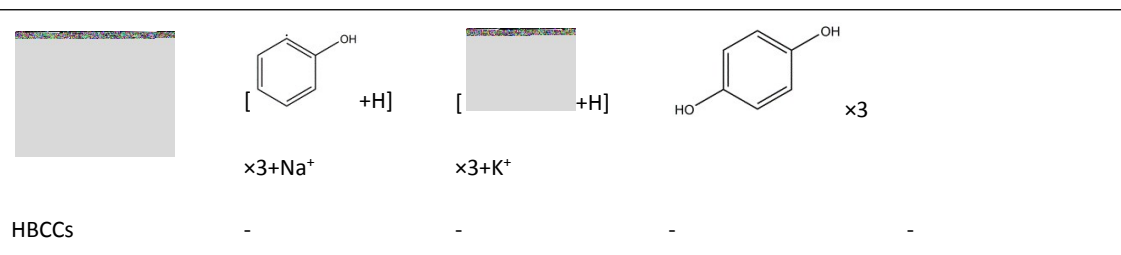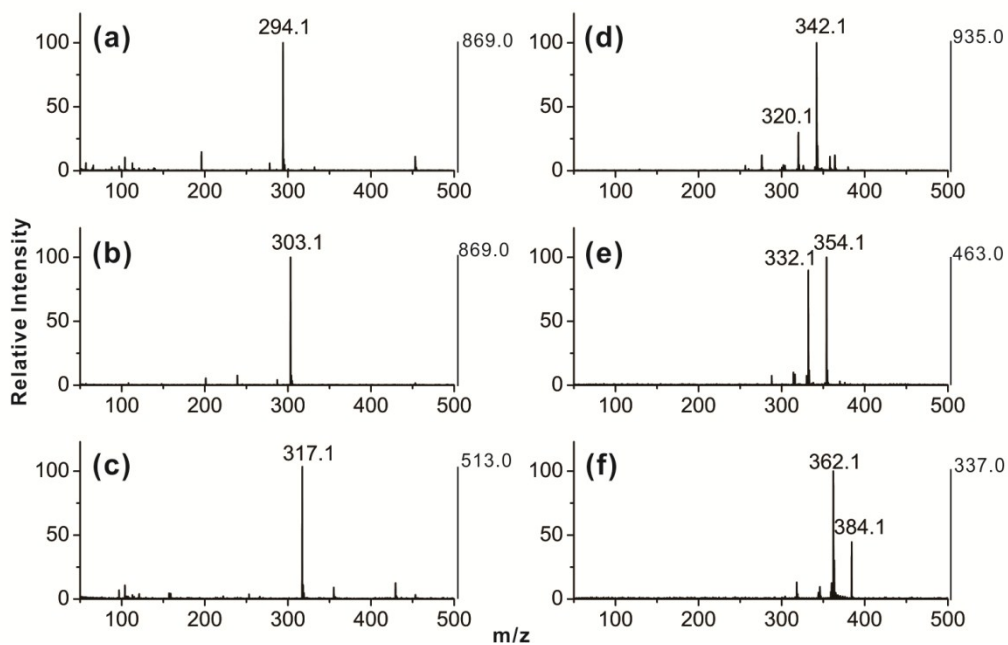

**Figure S4.** MALDI-TOF mass spectra of (a) is sulfathiazole ( $m/z$  294.0,  $[M + K]^+$ ), (b) is sulfamerazine ( $m/z$  303.1,  $[M + K]^+$ ) and (c) is sulfadimidine ( $m/z$  317.1,  $[M + K]^+$ ); and (d) is norfloxacin ( $m/z$  320.1,  $[M + H]^+$ ;  $m/z$  332.1,  $[M + Na]^+$ ), (e) is ciprofloxacin ( $m/z$  342.1,  $[M + H]^+$ ;  $m/z$  354.2,  $[M + Na]^+$ ), (f) is ofloxacin ( $m/z$  362.1,  $[M + H]^+$ ;  $m/z$  384.1,  $[M + Na]^+$ ).
